# Supplementary material
Source: Springer Nature journal article supplement (https://www.springermedizin.de/resource/supplementary/12984_2008_161_MOESM3_ESM.pdf/9605448)

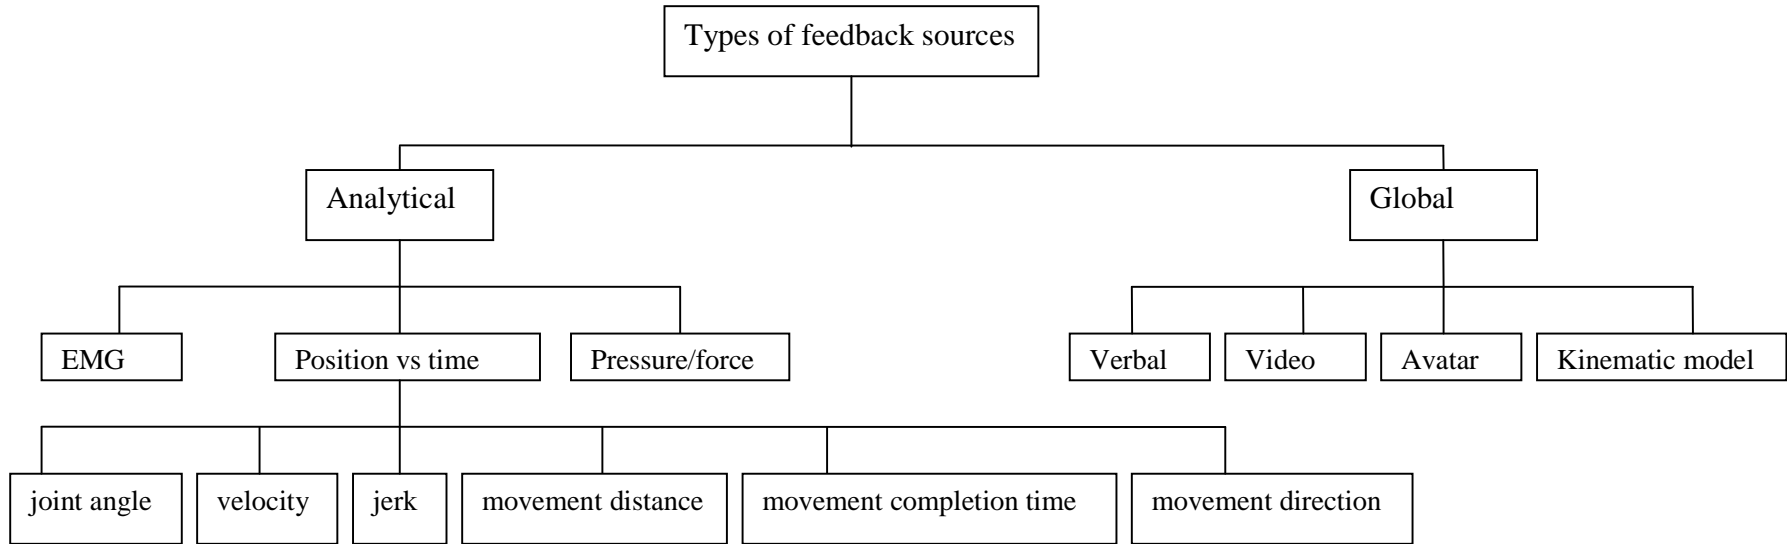

Supplement: MOESM3 [file 9605448]
